# Supplementary material
Source: publisher figshare collection journal article supplement (https://tandf.figshare.com/ndownloader/files/14229440)
Supplement: Supplementary file 1 [file 14229440]

1    **Supplement data**

2    **Table S1. General observation in the GF and BF mice.**

| General observations      | GF            | BF            |
|---------------------------|---------------|---------------|
| Body weight (g)           | 32.97 ± 2.05  | 33.84 ± 2.00  |
| Spleen (g)                | 0.064 ± 0.007 | 0.063 ± 0.012 |
| Cecum (g)                 | 4.31 ± 0.99   | 3.17 ± 0.56*  |
| Spleen (% of body weight) | 0.24 ± 0.02   | 0.23 ± 0.04   |
| Cecum (% of body weight)  | 15.8 ± 2.6    | 11.4 ± 1.7*   |
| Colon length (cm)         | 9.8 ± 0.4     | 9.5 ± 0.5     |

3    \*p< 0.05 compared with GF

4

5

6

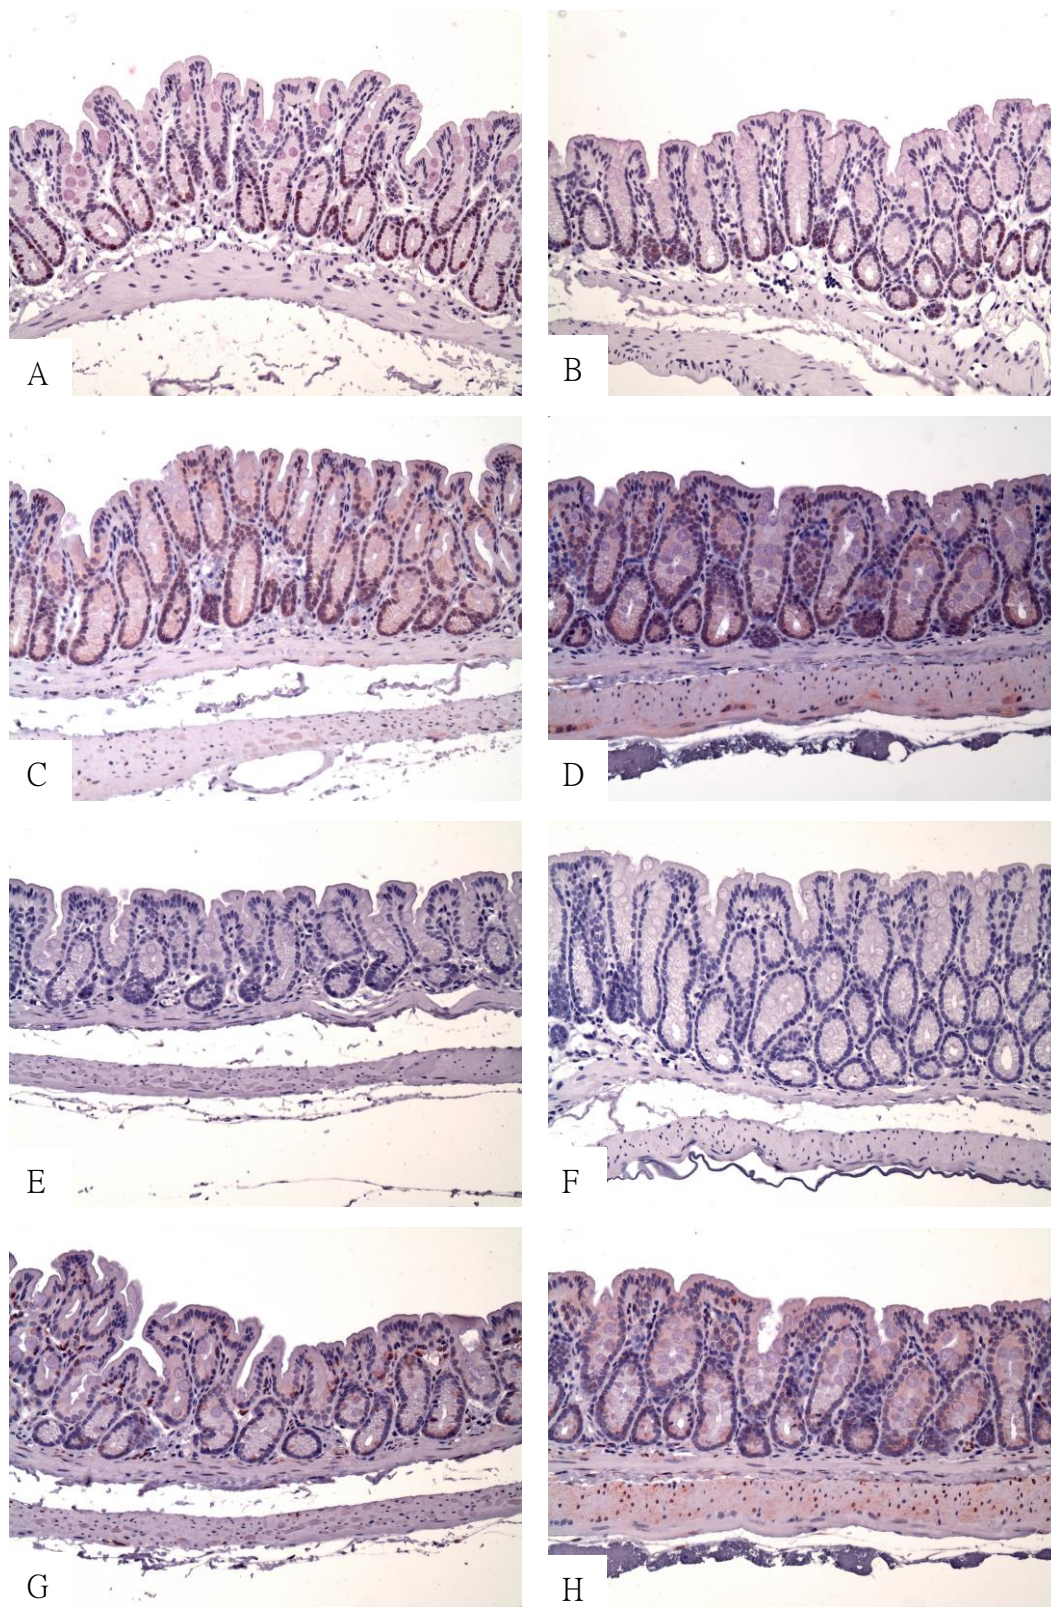

**Figure S1.** GF and *BF* mice without AOM/DSS in the distal colonic segment. Immunostaining for PCNA,  $\beta$ -catenin, Ly6G and COX2 in colon tissue sections. GF group (A, C, E, G) and *BF* group (B, D, F, H). The numbers of PCNA, Ly6G, COX2 positive cells and relative intensity of  $\beta$ -catenin were counted in the GF and *BF* group. Original magnification  $\times 200$ .
